# Supplementary material for: Determinants of Response to Talazoparib in Patients with HER2-Negative, Germline BRCA1/2-Mutated Breast Cancer
Source: PubMed Central journal article supplement — Clin Cancer Res. 2022 Jan 28;28(7):1383–90. doi: 10.1158/1078-0432.CCR-21-2080 (PMC9365365; doi:10.1158/1078-0432.ccr-21-2080), 2022-01-28
Supplement: ccr-21-2080_supplementary_figures_s1-7_supps1-7.pdf [file ccr-21-2080_supplementary_figures_s1-7_supps1-7.pdf]

**Supplementary Figure S1.** Proportion of patients evaluable for biomarker analysis.

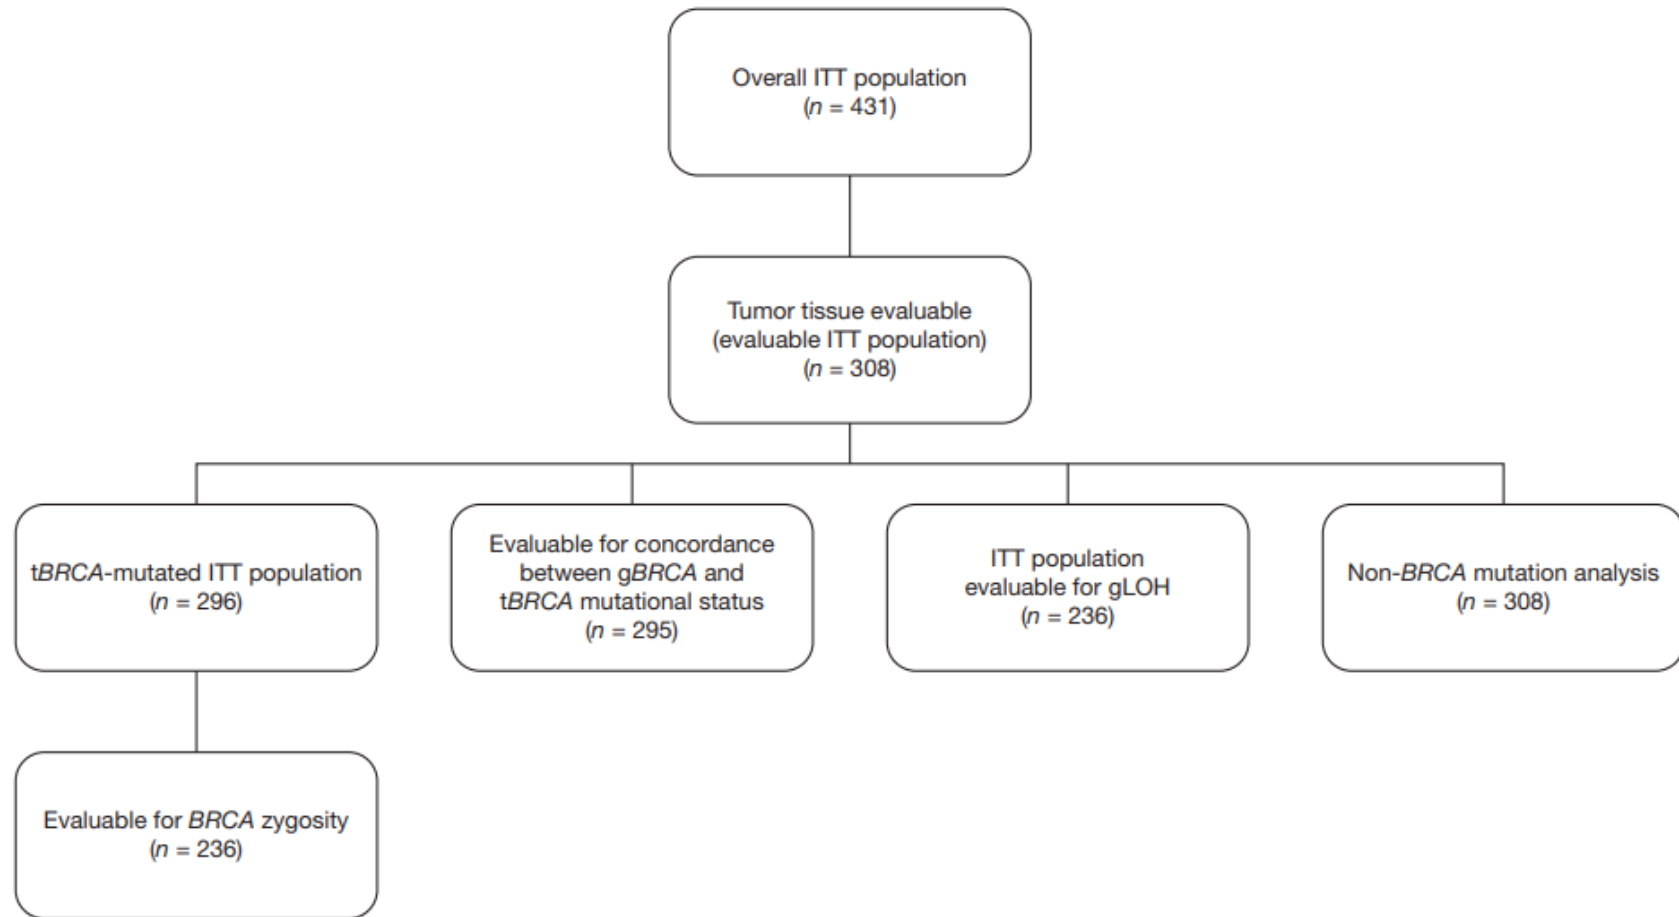

**Supplementary Figure S2.** Tumor *BRCA* mutations: **A**, evaluable ITT population; **B**, *tBRCA* loss of heterozygosity in the ITT population evaluable for *BRCA* zygosity.

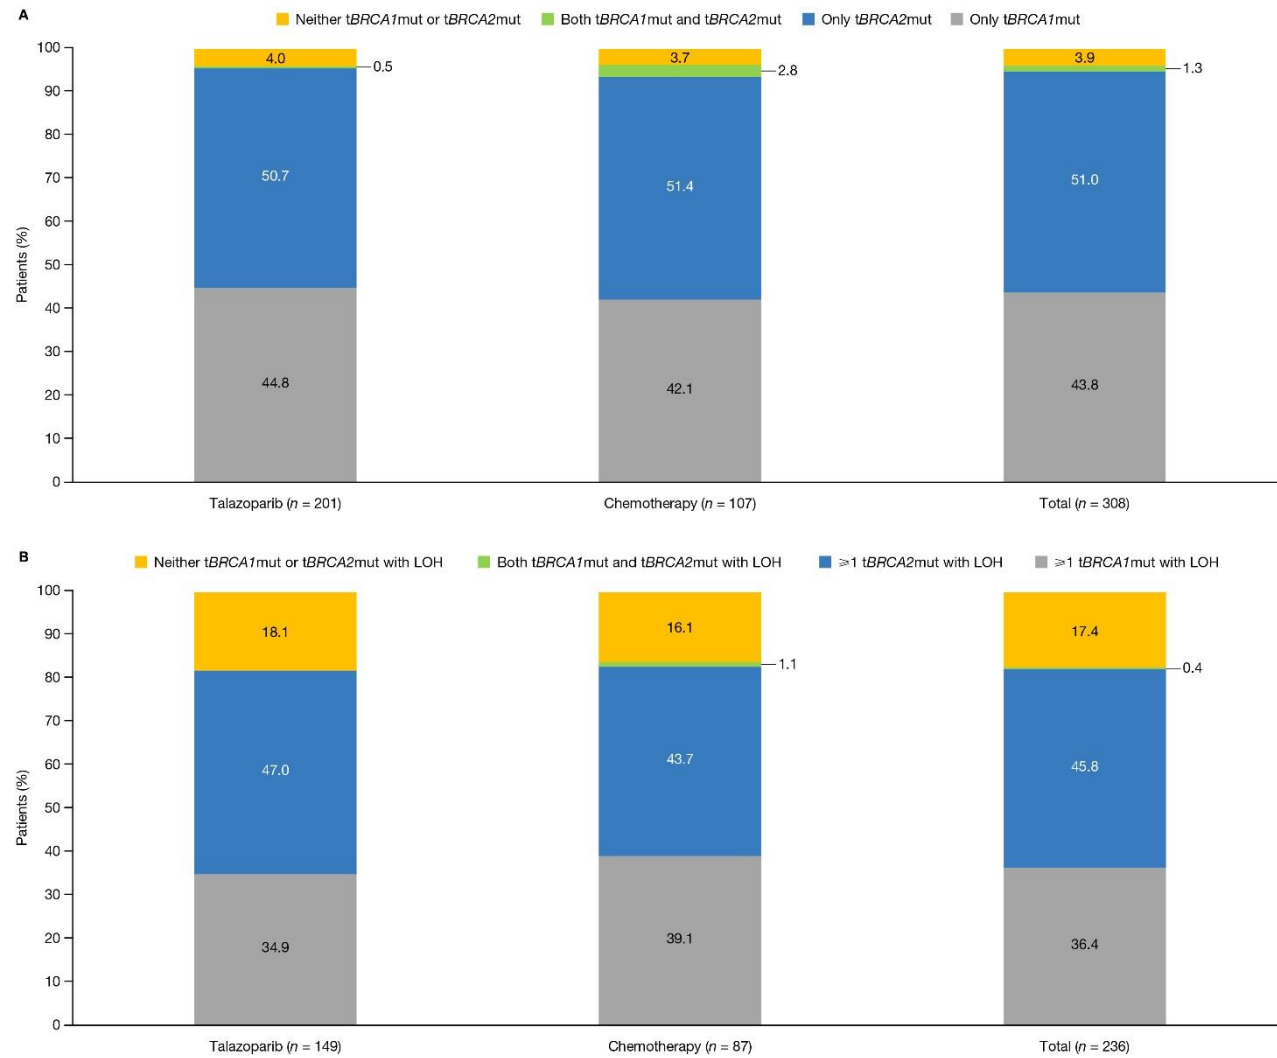

**Supplementary Figure S3.** Tumor gLOH by *BRCA* LOH status for evaluable ITT population: **A**, talazoparib; **B**, chemotherapy.

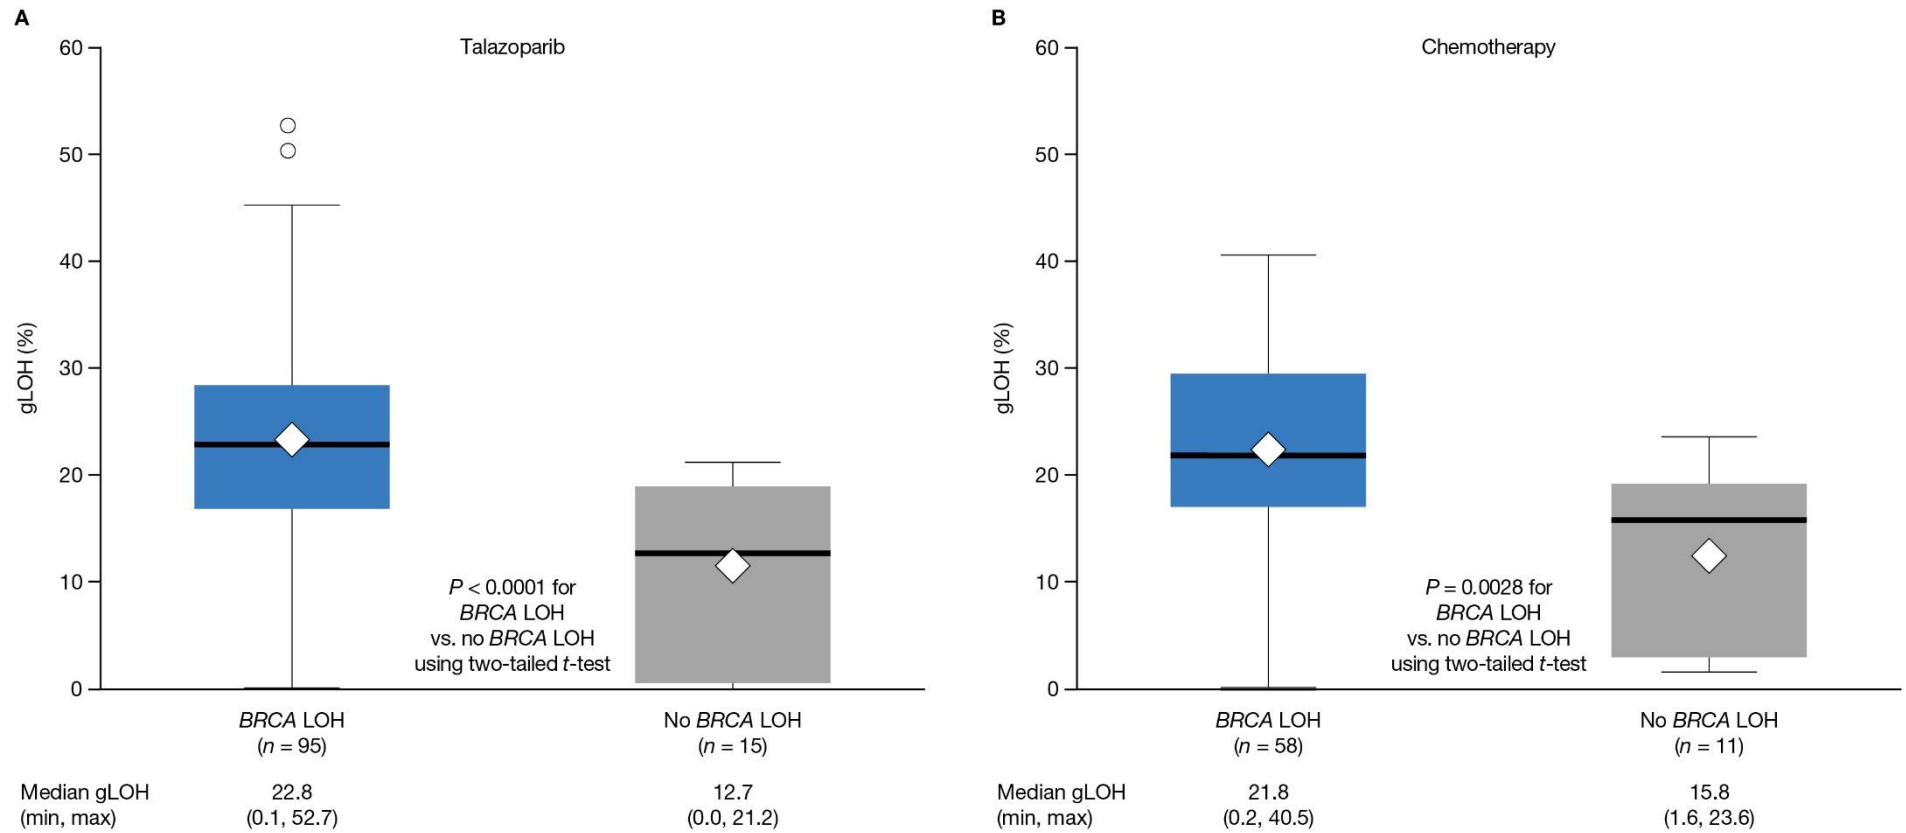

**Supplementary Figure S4.** Best percent change of sum of diameters of target lesions from baseline over time by investigator assessment by number of DDR gene mutations: **A**, talazoparib; **B**, chemotherapy (evaluable ITT population with measurable disease).

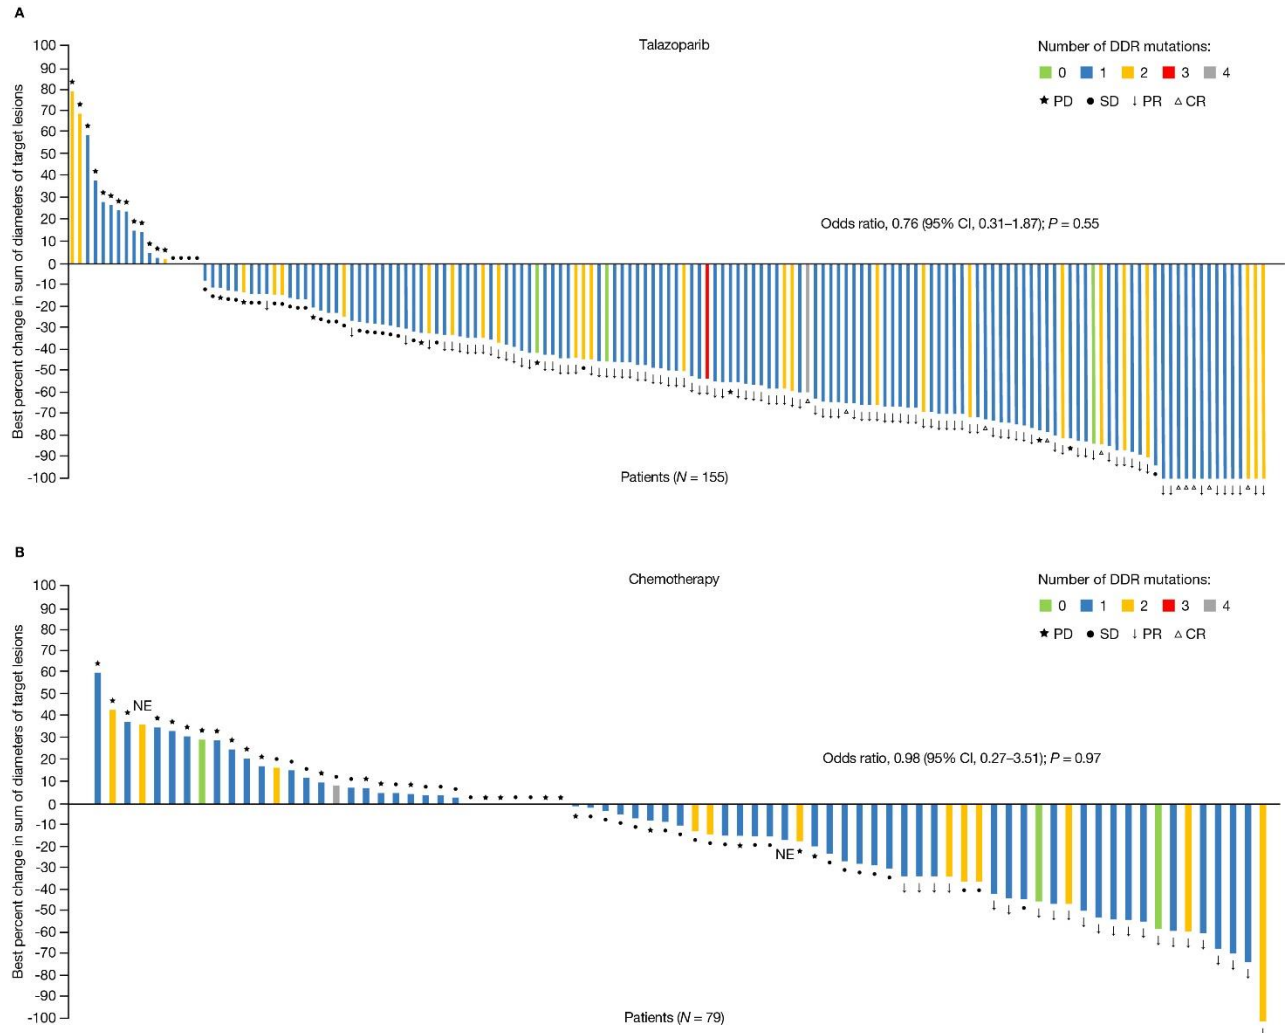

Odds ratio based on logistic regression of 1 vs.  $\geq 2$  DDR mutations.

Number of DDR mutations is sum of known and likely pathogenic variants in the following genes, excluding copy number changes: *ARID1A*, *ATR*, *ATM*, *BARD1*, *BRCA1*, *BRCA2*, *BRD4*, *BRIP1*, *CDK12*, *CHEK2*, *FANCA*, *FANCC*, *FANCG*, *NBN*, *PALB2*, *RAD51B*, and *STAG2*.

**Supplementary Figure S5.** gLOH by clinical benefit status – ITT population evaluable for clinical benefit and gLOH: **A**, talazoparib; **B**, chemotherapy.

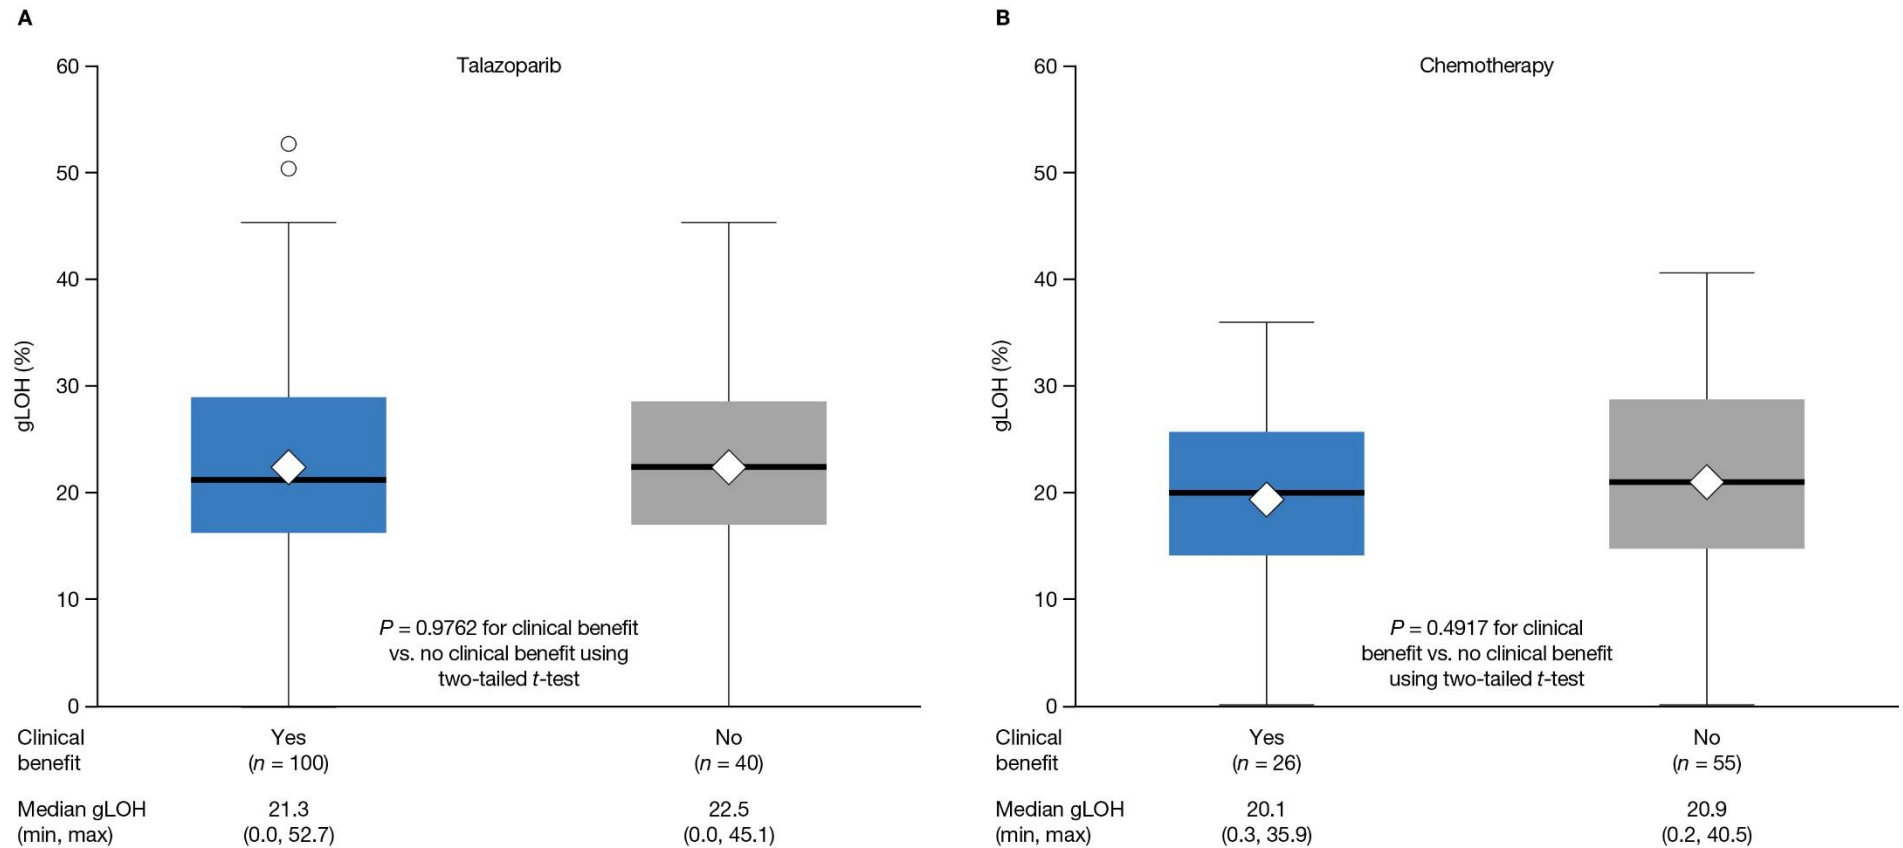

Clinical benefit assessment was based on target, non-target, and new lesions per RECIST 1.1, and confirmation of CR, PR, and SD was not required. Clinical benefit (Yes/No) was defined as the proportion of patients with a best overall response of CR, PR, or SD lasting  $\geq 24$  weeks from randomization per RECIST 1.1 as determined by investigator.

**Supplementary Figure S6.** gLOH by best overall response for unconfirmed CR/PR based on investigator assessment – evaluable ITT population with gLOH results.

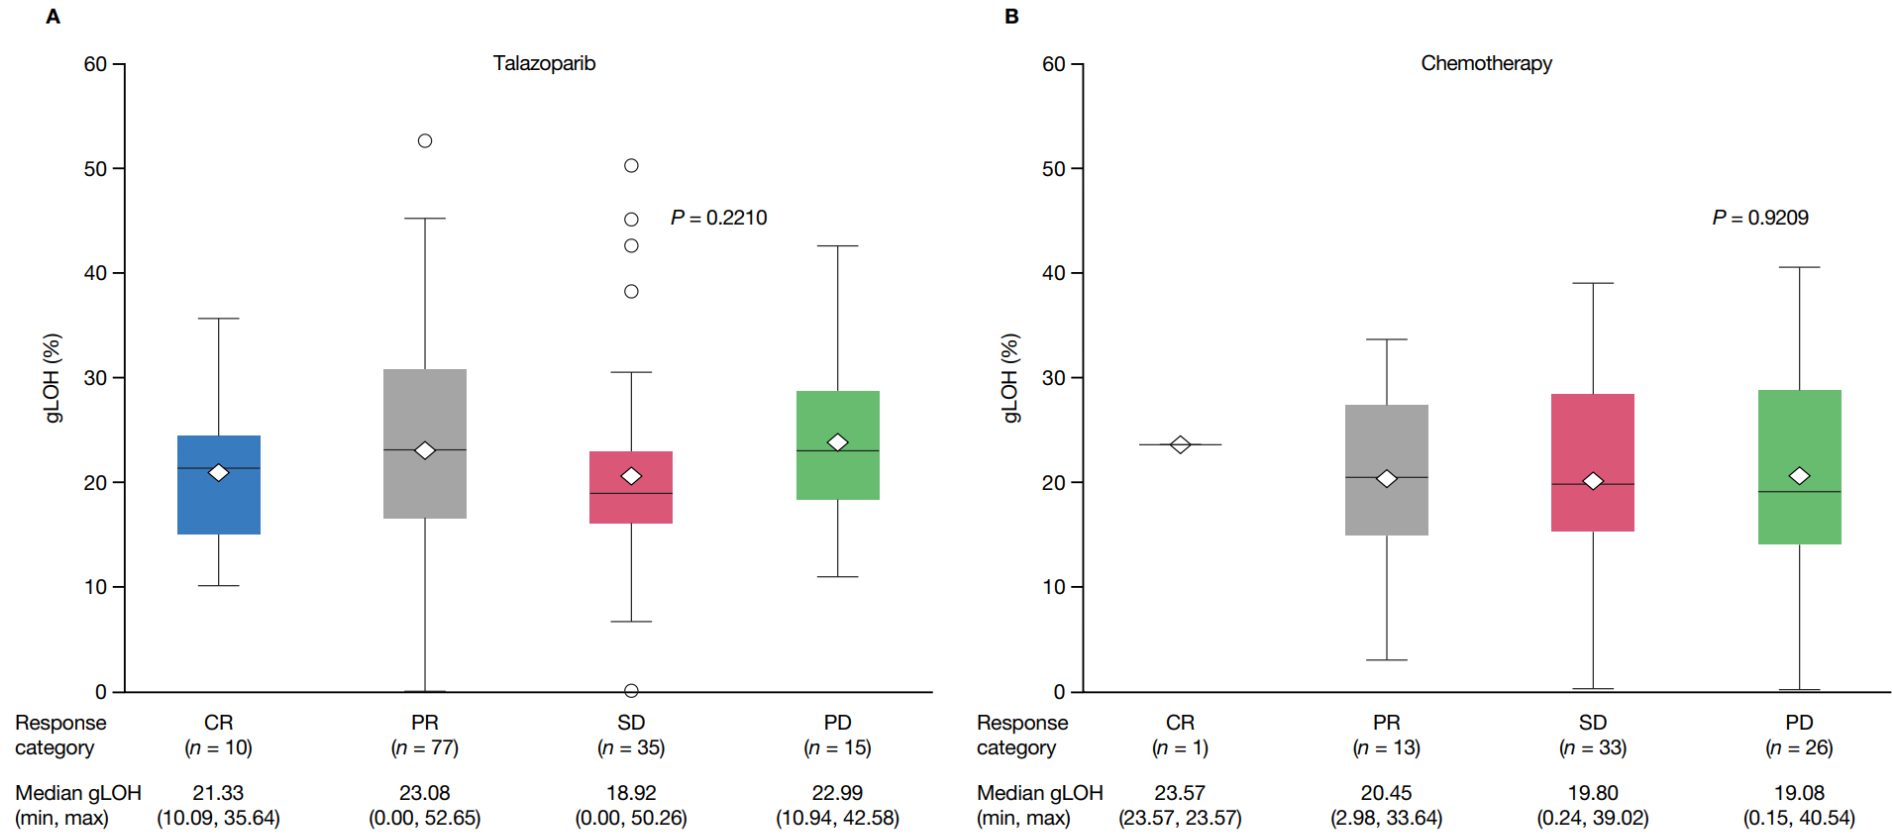

Abbreviation: PD, progressive disease.

Jonckheere-Terpstra trend test was used for statistical comparison of gLOH, across the response groups.

**Supplementary Figure S7.** Kaplan–Meier curves for duration of radiographic PFS by IRF assessment – evaluable ITT population with TNBC.

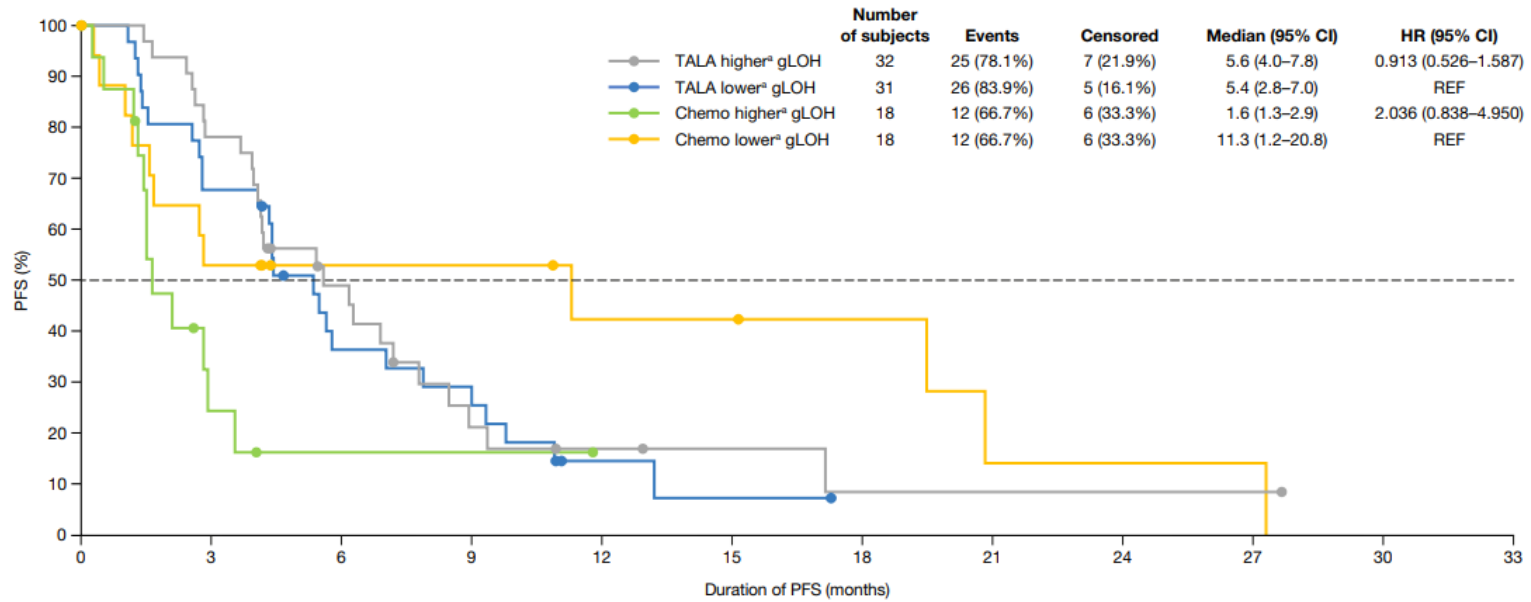

|                                        | 0   | 3     | 6    | 9    | 12   | 15   | 18   | 21   | 24   | 27   | 30   | 33   |
|----------------------------------------|-----|-------|------|------|------|------|------|------|------|------|------|------|
| TALA higher <sup>a</sup> gLOH: Ev/Cum  | 0/0 | 7/7   | 9/16 | 7/23 | 1/24 | 0/24 | 1/25 | 0/25 | 0/25 | 0/25 | 0/25 | 0/25 |
| Patients at risk                       | 32  | 25    | 13   | 5    | 3    | 2    | 1    | 1    | 1    | 1    | 0    | 0    |
| TALA lower <sup>a</sup> gLOH: Ev/Cum   | 0/0 | 10/10 | 9/19 | 2/21 | 4/25 | 1/26 | 0/26 | 0/26 | 0/26 | 0/26 | 0/26 | 0/26 |
| Patients at risk                       | 31  | 21    | 10   | 8    | 2    | 1    | 0    | 0    | 0    | 0    | 0    | 0    |
| Chemo higher <sup>a</sup> gLOH: Ev/Cum | 0/0 | 11/11 | 1/12 | 0/12 | 0/12 | 0/12 | 0/12 | 0/12 | 0/12 | 0/12 | 0/12 | 0/12 |
| Patients at risk                       | 18  | 3     | 1    | 1    | 0    | 0    | 0    | 0    | 0    | 0    | 0    | 0    |
| Chemo lower <sup>a</sup> gLOH: Ev/Cum  | 0/0 | 8/8   | 0/8  | 0/8  | 1/9  | 0/9  | 0/9  | 2/11 | 0/11 | 0/11 | 1/12 | 0/12 |
| Patients at risk                       | 18  | 9     | 6    | 6    | 4    | 4    | 3    | 1    | 1    | 1    | 0    | 0    |

Abbreviations: Chemo, chemotherapy; Cum, cumulative; Ev, events; REF, reference; TALA, talazoparib.

<sup>a</sup>Higher and lower indicate that gLOH is at or above or below the median, respectively. Hazard ratio is based on unstratified Cox regression model and is relative to talazoparib gLOH<median or chemotherapy gLOH<median with <1 favoring higher gLOH.
