# Supplementary material for: Determinants of Response to Talazoparib in Patients with HER2-Negative, Germline BRCA1/2-Mutated Breast Cancer
Source: PubMed Central journal article supplement — Clin Cancer Res. 2022 Jan 28;28(7):1383–90. doi: 10.1158/1078-0432.CCR-21-2080 (PMC9365365; doi:10.1158/1078-0432.ccr-21-2080), 2022-01-28
Supplement: ccr-21-2080_supplementary_tables_1-5_supp1-5.pdf [file ccr-21-2080_supplementary_tables_1-5_supp1-5.pdf]

**Supplementary Table S1.** Baseline characteristics for overall ITT population and population evaluable for F1CDx.

| Characteristic                                                                       | Overall ITT population   |                           | ITT population evaluable for F1CDx |                           |
|--------------------------------------------------------------------------------------|--------------------------|---------------------------|------------------------------------|---------------------------|
|                                                                                      | Talazoparib<br>(N = 287) | Chemotherapy<br>(N = 144) | Talazoparib<br>(N = 201)           | Chemotherapy<br>(N = 107) |
| Age, y                                                                               |                          |                           |                                    |                           |
| Median                                                                               | 45.0                     | 50.0                      | 46.0                               | 51.0                      |
| Range                                                                                | 27.0–84.0                | 24.0–88.0                 | 27.0–84.0                          | 24.0–88.0                 |
| Age <50 y, n (%)                                                                     | 182 (63.4)               | 67 (46.5)                 | 123 (61.2)                         | 47 (43.9)                 |
| Female sex, n (%)                                                                    | 283 (98.6)               | 141 (97.9)                | 198 (98.5)                         | 106 (99.1)                |
| ECOG performance status score, n (%)                                                 |                          |                           |                                    |                           |
| 0                                                                                    | 153 (53.3)               | 84 (58.3)                 | 103 (51.2)                         | 59 (55.1)                 |
| 1                                                                                    | 127 (44.3)               | 57 (39.6)                 | 93 (46.3)                          | 46 (43.0)                 |
| 2                                                                                    | 6 (2.1)                  | 2 (1.4)                   | 4 (2.0)                            | 2 (1.9)                   |
| Breast cancer stage, n (%)                                                           |                          |                           |                                    |                           |
| Locally advanced                                                                     | 15 (5.2)                 | 9 (6.3)                   | 11 (5.5)                           | 6 (5.6)                   |
| Metastatic                                                                           | 271 (94.4)               | 135 (93.8)                | 189 (94.0)                         | 101 (94.4)                |
| Measurable disease assessed by investigator, <sup>a</sup> n (%)                      | 219 (76.3)               | 114 (79.2)                | 158 (78.6)                         | 87 (81.3)                 |
| History of CNS metastases, n (%)                                                     | 43 (15.0)                | 20 (13.9)                 | 33 (16.4)                          | 17 (15.9)                 |
| Visceral disease, <sup>b</sup> n (%)                                                 | 201 (70.0)               | 103 (71.5)                | 141 (70.1)                         | 81 (75.7)                 |
| Hormone-receptor status, n (%)                                                       |                          |                           |                                    |                           |
| Triple-negative                                                                      | 130 (45.3)               | 60 (41.7)                 | 89 (44.3)                          | 43 (40.2)                 |
| Hormone receptor-positive                                                            | 157 (54.7)               | 84 (58.3)                 | 112 (55.7)                         | 64 (59.8)                 |
| BRCA status, <sup>c</sup> n (%)                                                      |                          |                           |                                    |                           |
| BRCA1-positive                                                                       | 133 (46.3)               | 63 (43.8)                 | 94 (46.8)                          | 48 (44.9)                 |
| BRCA2-positive                                                                       | 154 (53.7)               | 81 (56.3)                 | 107 (53.2)                         | 59 (55.1)                 |
| <12-mo disease-free interval from initial diagnosis to advanced breast cancer, n (%) | 108 (37.6)               | 42 (29.2)                 | 68 (33.8)                          | 29 (27.1)                 |

|                                                                                                         |            |            |            |           |
|---------------------------------------------------------------------------------------------------------|------------|------------|------------|-----------|
| Previous adjuvant or neoadjuvant therapy, <i>n</i> (%)                                                  | 238 (82.9) | 121 (84.0) | 169 (84.1) | 92 (86.0) |
| No. of previous hormone therapy-based regimens for hormone receptor-positive breast cancer <sup>d</sup> |            |            |            |           |
| Median                                                                                                  | 2.0        | 2.0        | 2.0        | 2.0       |
| Range                                                                                                   | 0–6        | 0–6        | 0–6        | 0–6       |
| Previous platinum therapy, <i>n</i> (%)                                                                 | 46 (16.0)  | 30 (20.8)  | 33 (16.4)  | 22 (20.6) |
| Previous cytotoxic regimens for advanced cancer, <i>n</i> (%)                                           |            |            |            |           |
| 0                                                                                                       | 111 (38.7) | 54 (37.5)  | 80 (39.8)  | 41 (38.3) |
| 1                                                                                                       | 107 (37.3) | 54 (37.5)  | 73 (36.3)  | 35 (32.7) |
| 2                                                                                                       | 57 (19.9)  | 28 (19.4)  | 41 (20.4)  | 25 (23.4) |
| 3                                                                                                       | 11 (3.8)   | 8 (5.6)    | 6 (3.0)    | 6 (5.6)   |

Abbreviations: CNS, central nervous system; ECOG, Eastern Cooperative Oncology Group; y, years.

<sup>a</sup>Measurable disease is defined as the presence of at least one target lesion at baseline.

<sup>b</sup>Visceral disease is defined as non-nodal target or non-target lesions identified at lung, liver, kidney, heart, stomach, small intestine, colon, rectum, ovary, uterus/endometrium, pancreas, thyroid, adrenal, and spleen at baseline.

<sup>c</sup>If both a Myriad and a local laboratory result exist in the database, the Myriad result (if positive) will be used. If both a Myriad and a local laboratory result exist in the database, the local result (if the Myriad result is negative) will be used.

<sup>d</sup>*n*=157 (talazoparib) and *n*=84 (chemotherapy) for the hormone receptor-positive ITT population and *n*=112 (talazoparib) and *n*=64 (chemotherapy) for the hormone receptor-positive ITT population evaluable for F1CDx.

**Supplementary Table S2.** Listing of *BRCA* variant profiles and selected clinical outcomes in patients lacking *tBRCAmut* – evaluable ITT.

| Patient ID | Treatment arm | <i>gBRCA1mut</i> | <i>gBRCA2mut</i> | Tumor                                |             |                  |             | Clinical benefit <sup>a</sup> | Best response <sup>b</sup> | PFS (months) <sup>c</sup> |
|------------|---------------|------------------|------------------|--------------------------------------|-------------|------------------|-------------|-------------------------------|----------------------------|---------------------------|
|            |               |                  |                  | <i>tBRCA1</i>                        | Pathogenic? | <i>tBRCA2</i>    | Pathogenic? |                               |                            |                           |
| 1          | Talazoparib   | IVS19-12G>A      |                  |                                      |             |                  |             | N                             | PD                         | 9.4                       |
| 2          | Talazoparib   | del exons 8–24   |                  | CNA                                  | Known       |                  |             | N                             | SD                         | 24.3                      |
| 3          | Talazoparib   |                  | del exons 14–16  |                                      |             | CNA              | Known       | Y                             | PR                         | 8.2                       |
| 4          | Talazoparib   | del exons 1–23   |                  | CNA                                  | Known       |                  |             | Y                             | SD                         | 21.5                      |
| 5          | Chemotherapy  |                  | 8096A>G (H2623R) |                                      |             | 7868A>G (H2623R) | Unknown     | Y                             | PR                         | 4.3                       |
| 6          | Talazoparib   | del exons 14–20  |                  | CNA                                  | Known       |                  |             | Y                             | PR                         | 17.3                      |
|            |               |                  |                  | Rearrangement ( <i>BRCA1-BRCA1</i> ) | Unknown     |                  |             |                               |                            |                           |
| 7          | Chemotherapy  |                  | del exon 14      |                                      |             | CNA              | Known       | Y                             | SD                         | 11.1                      |
| 8          | Talazoparib   | del exons 8–13   |                  | CNA                                  | Known       | 9976A>T (K3326*) | Unknown     | Y                             | PR                         | 11.1                      |
| 9          | Chemotherapy  | del exons 8–13   |                  | CNA                                  | Known       |                  |             | N                             | PD                         | 1.5                       |
| 10         | Talazoparib   |                  | 9424C>T (Q3066X) |                                      |             | 9196C>T (Q3066*) | Unknown     | Y                             | CR                         | 5.4                       |
| 11         | Chemotherapy  |                  |                  |                                      |             |                  |             | Y                             | PR                         | 4.4                       |
| 12         | Talazoparib   |                  | IVS3+5G>A        |                                      |             |                  |             | N                             | SD                         | 4.5                       |

<sup>a</sup>Clinical benefit assessment was based on target, non-target, and new lesions per RECIST 1.1, and confirmation of CR, PR, and SD was not required. CBR24 was defined as the proportion of patients with a best overall response of CR, PR, or SD lasting  $\geq 24$  weeks from randomization per RECIST v1.1 as determined by investigator.

<sup>b</sup>Best response using RECIST 1.1 by investigator (unconfirmed).

<sup>c</sup>PFS is using RECIST 1.1 by IRF assessment.

\*Amino acid is replaced by stop codon.

tBRCAmut is defined as known/likely pathologic variant (CNAs excluded). Patient 11 lacked a gBRCAmut based on Central testing, and was enrolled on the basis of local gBRCA test results. The test results are from central laboratories (Myriad BRACAnalysis<sup>®</sup> CDx for gBRCA, FoundationOne<sup>®</sup> CDx for tBRCA).

**Supplementary Table S3.** Baseline characteristics for patients without *BRCA* LOH.

| <b>Characteristic</b>                                                                       | <b>Talazoparib<br/>(N = 27)</b> | <b>Chemotherapy<br/>(N = 14)</b> |
|---------------------------------------------------------------------------------------------|---------------------------------|----------------------------------|
| Age, y                                                                                      |                                 |                                  |
| Median                                                                                      | 47.0                            | 52.5                             |
| Range                                                                                       | 28.0–77.0                       | 29.0–64.0                        |
| Age <50 y, <i>n</i> (%)                                                                     | 15 (55.6)                       | 4 (28.6)                         |
| Female sex, <i>n</i> (%)                                                                    | 27 (100.0)                      | 14 (100.0)                       |
| ECOG performance status score, <i>n</i> (%)                                                 |                                 |                                  |
| 0                                                                                           | 14 (51.9)                       | 9 (64.3)                         |
| 1                                                                                           | 12 (44.4)                       | 5 (35.7)                         |
| 2                                                                                           | –                               | –                                |
| Breast cancer stage, <i>n</i> (%)                                                           |                                 |                                  |
| Locally advanced                                                                            | –                               | –                                |
| Metastatic                                                                                  | 27 (100.0)                      | 14 (100.0)                       |
| Measurable disease assessed by investigator, <sup>a</sup> <i>n</i> (%)                      | 19 (70.4)                       | 10 (71.4)                        |
| History of CNS metastases, <i>n</i> (%)                                                     | 2 (7.4)                         | 2 (14.3)                         |
| Visceral disease, <sup>b</sup> <i>n</i> (%)                                                 | 18 (66.7)                       | 8 (57.1)                         |
| Hormone-receptor status, <i>n</i> (%)                                                       |                                 |                                  |
| Triple-negative                                                                             | 4 (14.8)                        | 5 (35.7)                         |
| Hormone receptor-positive                                                                   | 23 (85.2)                       | 9 (64.3)                         |
| <i>BRCA</i> status, <sup>c</sup> <i>n</i> (%)                                               |                                 |                                  |
| <i>BRCA1</i> -positive                                                                      | 9 (33.3)                        | 2 (14.3)                         |
| <i>BRCA2</i> -positive                                                                      | 18 (66.7)                       | 12 (85.7)                        |
| <12-mo disease-free interval from initial diagnosis to advanced breast cancer, <i>n</i> (%) | 7 (25.9)                        | 3 (21.4)                         |
| Previous adjuvant or neoadjuvant therapy, <i>n</i> (%)                                      | 22 (81.5)                       | 13 (92.9)                        |

No. of previous hormone therapy-based regimens for hormone receptor-positive breast cancer<sup>d</sup>

|                                                               |           |          |
|---------------------------------------------------------------|-----------|----------|
| Median                                                        | 2.0       | 3.0      |
| Range                                                         | 0–4       | 0–5      |
| Previous platinum therapy, <i>n</i> (%)                       | 4 (14.8)  | 6 (42.9) |
| Previous cytotoxic regimens for advanced cancer, <i>n</i> (%) |           |          |
| 0                                                             | 8 (29.6)  | 6 (42.9) |
| 1                                                             | 16 (59.3) | 3 (21.4) |
| 2                                                             | 3 (11.1)  | 5 (35.7) |
| 3                                                             | –         | –        |

Abbreviations: CNS, central nervous system; ECOG, Eastern Cooperative Oncology Group, y, years.

<sup>a</sup>Measurable disease is defined as the presence of at least one target lesion at baseline.

<sup>b</sup>Visceral disease is defined as non-nodal target or non-target lesions identified at lung, liver, kidney, heart, stomach, small intestine, colon, rectum, ovary, uterus/endometrium, pancreas, thyroid, adrenal, and spleen at baseline.

<sup>c</sup>If both a Myriad and a local laboratory result exist in the database, the Myriad result (if positive) will be used. If both a Myriad and a local laboratory result exist in the database, the local result (if the Myriad result is negative) will be used.

<sup>d</sup>*n*=23 (talazoparib) and *n*=9 (chemotherapy) for the hormone receptor-positive ITT population evaluable for F1CDx and *BRCA* zygosity without *BRCA* LOH.

**Supplementary Table S4.** PFS according to alteration status of selected tumor tissue non-*BRCA* genes – t*BRCA*mut ITT population.

| Evaluable ITT population<br>with tumors bearing<br><i>BRCA1/2</i> mut | Talazoparib<br>( <i>n</i> = 193) |                     | Chemotherapy<br>( <i>n</i> = 103) |                     |
|-----------------------------------------------------------------------|----------------------------------|---------------------|-----------------------------------|---------------------|
|                                                                       | Mutations                        | CNAs                | Mutations                         | CNAs                |
| <i>TP53</i>                                                           |                                  |                     |                                   |                     |
| HR (95% CI)                                                           | 1.693 (1.186–2.418)              | NE                  | 1.439 (0.859–2.411)               | NE                  |
| <i>n</i> , altered/unaltered                                          | 99/94                            |                     | 55/48                             |                     |
| <i>n</i> , events<br>altered/unaltered                                | 73/53                            |                     | 34/28                             |                     |
| <i>P</i> Value                                                        | 0.0033                           | NE                  | 0.1614                            | NE                  |
| <i>RAD21</i>                                                          |                                  |                     |                                   |                     |
| HR (95% CI)                                                           | NE                               | 0.634 (0.369–1.088) | NE                                | 1.174 (0.672–2.049) |
| <i>n</i> , altered/unaltered                                          |                                  | 33/160              |                                   | 30/73               |
| <i>n</i> , events<br>altered/unaltered                                |                                  | 16/110              |                                   | 18/44               |
| <i>P</i> Value                                                        | NE                               | 0.0940              | NE                                | 0.5699              |
| <i>MYC</i>                                                            |                                  |                     |                                   |                     |
| HR (95% CI)                                                           | NE                               | 1.323 (0.852–2.057) | NE                                | 1.052 (0.586–1.892) |
| <i>n</i> , altered/unaltered                                          |                                  | 37/156              |                                   | 25/78               |
| <i>n</i> , events<br>altered/unaltered                                |                                  | 25/101              |                                   | 16/46               |
| <i>P</i> Value                                                        | NE                               | 0.2103              | NE                                | 0.8634              |
| <i>PTEN</i>                                                           |                                  |                     |                                   |                     |
| HR (95% CI)                                                           | 1.813 (0.973–3.378)              | 0.963 (0.530–1.750) | 1.762 (0.834–3.725)               | NE                  |
| <i>n</i> , altered/unaltered                                          | 13/180                           | 18/175              | 11/92                             |                     |
| <i>n</i> , events<br>altered/unaltered                                | 11/115                           | 12/114              | 8/54                              |                     |
| <i>P</i> Value                                                        | 0.0564                           | 0.8992              | 0.1302                            | NE                  |
| <i>PIK3CA</i>                                                         |                                  |                     |                                   |                     |
| HR (95% CI)                                                           | 1.198 (0.697–2.058)              | NE                  | 0.639 (0.272–1.499)               | NE                  |
| <i>n</i> , altered/unaltered                                          | 22/171                           |                     | 10/93                             |                     |

|                                     |        |    |        |    |
|-------------------------------------|--------|----|--------|----|
| <i>n</i> , events altered/unaltered | 15/111 |    | 7/55   |    |
| <i>P</i> Value                      | 0.5119 | NE | 0.2962 | NE |

Abbreviation: NE, not evaluable.

Cox proportional hazards model with wildtype as the reference group was used to calculate HR and 95% CI. HR <1 indicates better survival in the alteration group, while HR >1 indicates better survival in the no alteration group. Log-rank 2-sided test was performed to compare between no alteration/alteration groups. The tBRCAmut ITT population includes all patients with tumor samples suitable for the genomic evaluation and analyzed using FoundationOne® CDx who have known or likely pathogenic BRCA variants (BRCA CNAs excluded). For TP53, RAD21, MYC, PTEN, and PIK3CA, known/likely pathogenic variants are included, segregated as mutations (CNAs excluded) or CNAs only. PFS is using RECIST 1.1 by IRF assessment. For the analyses shown, both mutant/copy number altered (i.e., alteration) and non-mutant/non-copy number altered (i.e., no alteration) subgroups had ≥10 patients, otherwise analyses were deemed NE.



**Supplementary Table S5.** PFS based on IRF by gLOH – ITT population with gLOH results.

| <b>PFS</b>                                             | <b>Talazoparib (N = 140)</b> | <b>Chemotherapy (N = 81)</b> |
|--------------------------------------------------------|------------------------------|------------------------------|
| Duration of PFS, <sup>a</sup> mo                       |                              |                              |
| <i>n</i>                                               | 140                          | 81                           |
| Censored, <i>n</i> (%)                                 | 47 (33.6)                    | 32 (39.5)                    |
| Treatment comparison<br>(talazoparib vs. chemotherapy) |                              |                              |
| Hazard ratio (95% CI) <sup>b</sup>                     | 0.993 (0.975–1.012)          |                              |
| <i>P</i> Value <sup>b</sup>                            | 0.9668                       |                              |

<sup>a</sup>Based on Kaplan–Meier estimates.

<sup>b</sup>Hazard ratio is based on stratified Cox regression model with treatment and gLOH as the covariates (stratification factors are number of prior cytotoxic chemotherapy regimens, triple negative status, history of central nervous system metastases) and indicates the change in the duration of PFS if the value of gLOH rises by one unit. *P* Value is based on a stratified log-rank test.
